# Supplementary material
Source: Springer Nature journal article supplement (https://www.springermedizin.de/resource/supplementary/12883_2011_506_MOESM7_ESM.pdf/9455290)

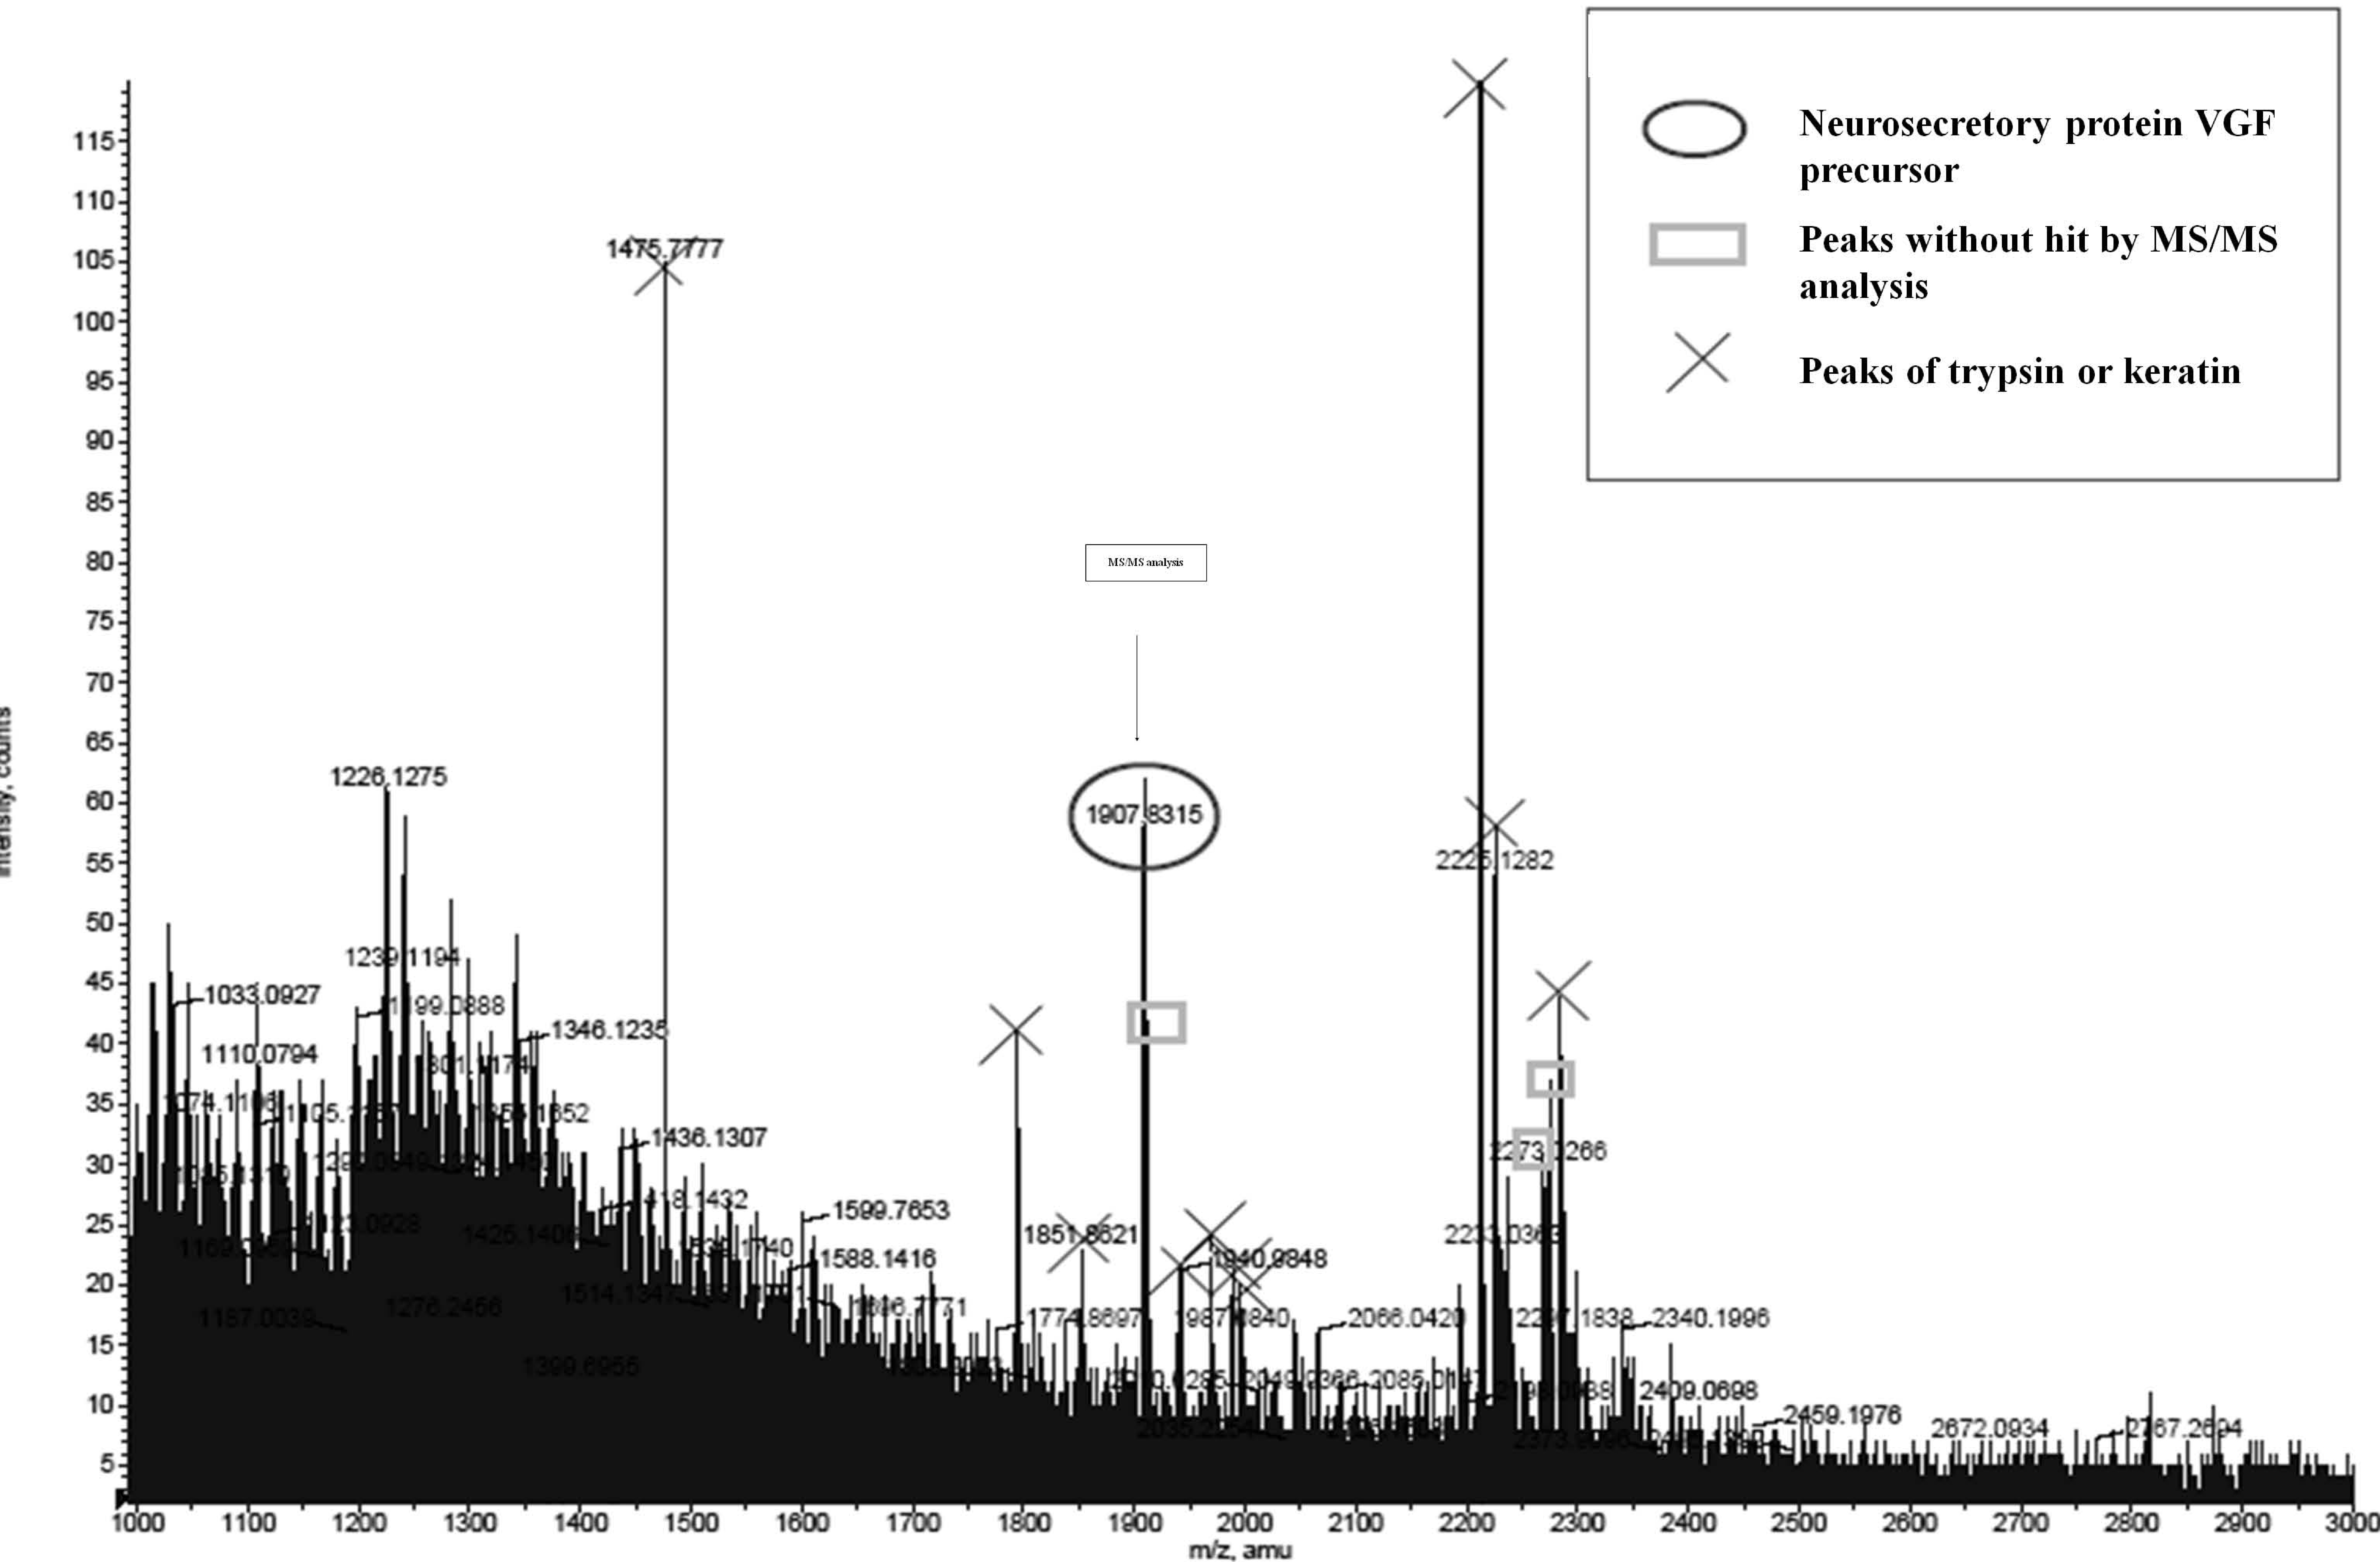

Supplement: MOESM7 [file 9455290]
